# Supplementary material
Source: PubMed Central journal article supplement (PMC9406129)
Supplement: NIHMS1830556-supplement-Supplement.pdf [file NIHMS1830556-supplement-Supplement.pdf]

Data supplement to Hallahan et al. Efficacy of omega-3 highly unsaturated fatty acids in the treatment of depression. Br J Psychiatry doi: 10.1192/bjp.bp.114.160242

**Online Supplement DS1**

**Table DS1** Systematic Review of randomised controlled trials of omega-3 highly unsaturated fatty acids (HUFAs) in mood disorders

| Study group                                   | <i>n</i> (Total; <i>n</i> -3 HUFA/placebo) and <i>n</i> of strata in meta-analysis                                                                                                                                | Study duration and time of assessments             | Illness type and patient group                                           | HUFA formulations (daily dose) v. placebo | Measurement used and outcome of trial                                                                                                                                               | Clinical depression rating | Design issues and possible threats to validity                                                      | Jadad rating of study quality | Diagnosed v. non-diagnosed depression |
|-----------------------------------------------|-------------------------------------------------------------------------------------------------------------------------------------------------------------------------------------------------------------------|----------------------------------------------------|--------------------------------------------------------------------------|-------------------------------------------|-------------------------------------------------------------------------------------------------------------------------------------------------------------------------------------|----------------------------|-----------------------------------------------------------------------------------------------------|-------------------------------|---------------------------------------|
| 1. Andreeva <i>et al</i> , 2012 <sup>1</sup>  | 2000<br>– 1000 <i>n</i> -3 HUFA<br>– 1000 placebo<br>Both <i>n</i> -3 HUFA and placebo groups were split into those who attained B Vitamins and those who did not<br>Split according to men and women<br>Strata 2 | 5 years<br>Assessment: 0, 3, 5 years               | Post-myocardial infarction, stroke or unstable angina in 45–80 year olds | <b>EPA 0.4g + DHA 0.2g</b>                | GDS (French Version; GDS > 10=depression)<br>No difference between groups<br>Men treated with <i>n</i> -3 HUFA had a trend ( <i>P</i> =0.053) towards attaining depressive symptoms | 3                          | Individuals were not depressed at baseline                                                          | 3                             | EPA: non-Clinical                     |
| 2. Appleton <i>et al</i> , 2011 <sup>81</sup> | 113<br>– 53 <i>n</i> -3 HUFA<br>– 60 placebo<br>Not receiving antidepressant treatment                                                                                                                            | 12 weeks                                           | Mild–moderate depression (measured on DASS)                              | <b>EPA 0.63g + DHA 0.85g</b>              | DASS (10–24)                                                                                                                                                                        | –                          | No statistical data relating to depression is presented                                             | –                             | –                                     |
| 3. Bot <i>et al</i> , 2010 <sup>2</sup>       | 25<br>– 13 <i>n</i> -3 HUFA<br>– 12 placebo<br>Strata 1                                                                                                                                                           | 12 weeks<br>Assessment: 0, 1, 3, 5, 7, 9, 12 weeks | Diabetes mellitus and comorbid MDD (CIDI)                                | <b>E-EPA 1g</b>                           | MADRS<br>No difference between the groups                                                                                                                                           | 2                          | Small sample size<br>Heterogenous sample, in relation to antidepressant usage and type of diabetes  | 5                             | EPA: clinical                         |
| 4. Carney <i>et al</i> , 2009 <sup>3</sup>    | 122<br>– 62 <i>n</i> -3 HUFA<br>– 60 placebo<br>Strata 1                                                                                                                                                          | 10 weeks<br>Assessment: 0, 4, 10 weeks             | MDD in coronary heart disease (BDI-II ≥16 and PHQ ≥10)<br>Adults         | <b>EPA 0.930g + DHA 0.75g</b>             | HDRS, BDI, PHQ<br>No differences between the groups                                                                                                                                 | 2                          | Short trial duration                                                                                | 6                             | EPA: clinical                         |
| 5. Chiu <i>et al</i> , 2005 <sup>50</sup>     | 15<br><i>n</i> -3 HUFA, placebo but unclear how many per group<br>Not included in meta-analysis                                                                                                                   | 4 weeks<br>Assessment: 0, 1, 2, 3, 4 weeks         | BPAD (Manic, YMRS >20)                                                   | <b>EPA 2.2g + DHA 1.6g</b>                | YMRS, HDRS, PANSS, CGI<br>No significant difference between groups for any measure                                                                                                  | –                          | Small number of study participants<br>Statistical data not available for inclusion in meta-analysis | –                             | –                                     |

|                                                  |                                                                                                                                    |                                                                                                                |                                                                                       |                                                              |                                                                                                                                                                                                 |   |                                                                                                                                                                                                              |   |                   |
|--------------------------------------------------|------------------------------------------------------------------------------------------------------------------------------------|----------------------------------------------------------------------------------------------------------------|---------------------------------------------------------------------------------------|--------------------------------------------------------------|-------------------------------------------------------------------------------------------------------------------------------------------------------------------------------------------------|---|--------------------------------------------------------------------------------------------------------------------------------------------------------------------------------------------------------------|---|-------------------|
| 6. da Silva <i>et al</i> , 2008 <sup>4</sup>     | 29<br>– 6 <i>n</i> -3 HUFA<br>– 8 <i>n</i> -3 HUFA and antidepressant<br>– 7 placebo<br>– 8 placebo and antidepressant<br>Strata 2 | 12 weeks<br>Assessment: 0, 12 weeks                                                                            | MDD in individuals with Parkinson's disease<br>Adults (45–78 years old)               | <b>EPA</b> 0.72g + <b>DHA</b> 0.48g                          | MADRS, BDI, CGI<br><i>n</i> -3 HUFAs were superior to placebo for individuals both on and off antidepressants                                                                                   | 2 | Relatively small sample size                                                                                                                                                                                 | 6 | EPA: clinical     |
| 7. Doornbos <i>et al</i> , 2009 <sup>5</sup>     | 119<br>– 42 DHA<br>– 41 DHA+ arachidonic acid<br>– 36 placebo<br>Strata 1                                                          | 24 weeks of pregnancy and 6 weeks post-partum<br>Assessment: weeks 16, 36 of pregnancy and 6 weeks post-partum | Healthy pregnant women to investigate the emergence of perinatal depression<br>Adults | <b>DHA</b> 0.22g / <b>DHA</b> 0.22g + arachidonic acid 0.22g | EPDS<br>DHA or DHA+ arachidonic acid were not superior to placebo in preventing the emergence of depressive symptoms                                                                            | 4 | Large drop-out rates during pregnancy                                                                                                                                                                        | 4 | DHA: non-clinical |
| 8. Frangou <i>et al</i> , 2006 <sup>6</sup>      | 75<br>– 24 EPA 1g<br>– 25 EPA 2g<br>– 26 placebo<br>Strata 2                                                                       | 12 weeks<br>Assessment: 0, 4, 12 weeks                                                                         | BPAD (depressed/rapid cycling)<br>HDRS >10)<br>Adults                                 | <b>EPA</b> 1g or 2g                                          | HDRS, YMRS, CGI<br>EPA at both doses was superior to placebo at study end ( <i>P</i> =0.03)                                                                                                     | 1 | Various psychotropic agents were used, with alterations in medication allowed during study                                                                                                                   | 6 | EPA: clinical     |
| 9. Freeman <i>et al</i> , 2008 <sup>7</sup>      | 51<br>– 28 <i>n</i> -3 HUFA<br>– 23 placebo<br>Strata 1                                                                            | 8 weeks<br>Assessment: 0, 8 weeks                                                                              | Perinatal MDD (EPDS >9)<br>Adults                                                     | <b>EPA</b> 1.1g + <b>DHA</b> 0.8g                            | HDRS, EPDS, CGI<br>No significant difference between the groups                                                                                                                                 | 3 | Short trial duration<br>Study included pregnant and post-partum individuals                                                                                                                                  | 6 | EPA: clinical     |
| 10. Freund-Levi <i>et al</i> , 2008 <sup>8</sup> | 178<br>– 91 <i>n</i> -3 HUFA<br>– 87 placebo<br>Strata 1                                                                           | 26 weeks<br>Assessment: 0, 26 weeks                                                                            | Mild–moderate Alzheimer's disease in elderly population                               | <b>DHA</b> 1.72g + <b>EPA</b> 0.6g                           | MADRS<br>No difference between groups, but non-APOE4 Alzheimer's disease group treated with <i>n</i> -3 HUFA ( <i>n</i> =27) had improved scores on MADRS compared with placebo ( <i>n</i> =18) | 4 | Individuals were not depressed at baseline<br>Presence of variable levels of Alzheimer's disease suggest cautious interpretation of mood scores<br>Per-protocol rather than intention-to-treat analysis used | 5 | DHA: non-Clinical |

|                                                |                                                                                                                                                                                                           |                                                                   |                                                                                                                                             |                                                                                                              |                                                                                                                                                                                                                          |   |                                                                                                                                                                                                               |   |                       |
|------------------------------------------------|-----------------------------------------------------------------------------------------------------------------------------------------------------------------------------------------------------------|-------------------------------------------------------------------|---------------------------------------------------------------------------------------------------------------------------------------------|--------------------------------------------------------------------------------------------------------------|--------------------------------------------------------------------------------------------------------------------------------------------------------------------------------------------------------------------------|---|---------------------------------------------------------------------------------------------------------------------------------------------------------------------------------------------------------------|---|-----------------------|
| 11. Gertsik <i>et al</i> , 2012 <sup>9</sup>   | 40<br>– 18 <i>n</i> -3 HUFA<br>– 22 placebo<br>Strata 1                                                                                                                                                   | 8 weeks<br>Assessment: 0,<br>1, 2, 4, 6, 8<br>weeks               | MDD<br>(HDRS > 17)<br>Adults                                                                                                                | <b>EPA 0.9g</b><br>+ DHA<br>0.2g and<br>citalopram<br>20–40mg                                                | HDRS, MDRS, BDI,<br>CGI<br><i>n</i> -3 HUFA group had<br>a significant<br>reduction in<br>symptoms compared<br>with controls<br>( <i>P</i> =0.008)                                                                       | 1 | Short trial duration<br>Small sample size                                                                                                                                                                     | 5 | EPA: clinical         |
| 12. Giltay <i>et al</i> , 2011 <sup>10</sup>   | 4,068<br>– 1007 EPA–DHA (36<br>on antidepressants)<br>– 1009 EPA–DHA<br>+ALA (35 on<br>antidepressants)<br>– 1022 ALA (29 on<br>Antidepressants)<br>– 1030 placebo (40 on<br>antidepressants)<br>Strata 6 | 40 months                                                         | Adults, post-<br>myocardial<br>infarction                                                                                                   | ALA 2g &<br><b>EPA 0.24g</b><br>+ DHA<br>0.16g<br>or<br><b>EPA 0.24g</b><br>+DHA<br>0.16g<br>Or<br>ALA 2g    | GDS<br>No difference<br>between groups in<br>depressive symptoms<br>Benefit for EPA-<br>DHA in group<br>already taking<br>antidepressants<br>( <i>P</i> =0.04)                                                           | 3 | A small percentage<br>of individuals had<br>depression at study<br>entry<br>ALA increased<br>EPA but not DHA<br>serum levels and<br>thus included in<br>analysis in<br>'selectively<br>enriched' EPA<br>group | 6 | EPA: non-<br>Clinical |
| 13. Gracious <i>et al</i> , 2010 <sup>53</sup> | 51<br>– 25 $\alpha$ -LNA<br>– 26 placebo<br>Not in meta-analysis                                                                                                                                          | 16 weeks<br>Assessment: 0,<br>2, 4, 6, 8, 10,<br>12, 16 weeks     | BPAD (manic,<br>hypomanic, mixed<br>or depressed)<br>CGI-BP $\geq$ 3, YMRS<br>$\geq$ 4, or CDRS-R<br>$\geq$ 22.<br>Children (6–17<br>years) | <b>ALA 0.55-<br/>5.5g</b><br><b>EPA</b> but<br>not DHA<br>increased<br>in serum in<br>$\alpha$ -LNA<br>group | YMRS, CDRS, CGI-<br>BP<br>No significant benefit<br>over placebo<br>Symptom severity<br>was negatively<br>correlated with serum<br>% $\alpha$ -LNA and %<br>EPA, and positively<br>correlated with %<br>arachidonic acid | – | HUFA agent was<br>ALA and not EPA<br>or DHA and thus<br>study was not<br>included in meta-<br>analysis as dose of<br>EPA or DHA was<br>not possible to<br>elucidate                                           | 6 | –                     |
| 14. Greyner <i>et al</i> , 2007 <sup>11</sup>  | 83<br>– 43 <i>n</i> -3 HUFA<br>– 40 placebo<br>Strata 1                                                                                                                                                   | 16 weeks<br>Assessment:<br>baseline and at<br>weekly<br>intervals | MDD (HDRS $\geq$ 16)<br>Adults                                                                                                              | <b>DHA</b> 2.2g<br>+ EPA<br>0.6g                                                                             | HDRS, BDI, GAF<br>No significant<br>difference between<br>the groups                                                                                                                                                     | 1 | Making was<br>insufficient (most<br>patients correctly<br>guessed the<br>supplements)                                                                                                                         | 6 | DHA: clinical         |

|                                                    |                                                                                                                                                           |                                                          |                                                                                                                                            |                                                                 |                                                                                                                                                                 |   |                                                                                                                                                                                                                         |   |                   |
|----------------------------------------------------|-----------------------------------------------------------------------------------------------------------------------------------------------------------|----------------------------------------------------------|--------------------------------------------------------------------------------------------------------------------------------------------|-----------------------------------------------------------------|-----------------------------------------------------------------------------------------------------------------------------------------------------------------|---|-------------------------------------------------------------------------------------------------------------------------------------------------------------------------------------------------------------------------|---|-------------------|
| 15. Hallahan <i>et al</i> , 2007 <sup>12</sup>     | 49<br>– 22 <i>n</i> -3 HUFA<br>– 27 placebo<br>Strata 1                                                                                                   | 12 weeks<br>Assessment: 0, 3, 4, 6, 8, 9, 12 weeks       | Individuals with a history of repetitive self-harm<br>MDD (BDI score >19 (mean 35) and 46 patients had HDRS score >14 (mean 24))<br>Adults | <b>EPA</b> 1.2g + DHA 0.9g                                      | HDRS, BDI, PSS, OAS-M, DHUS<br><i>n</i> -3 HUFAs were superior to placebo on the HDRS from 6 weeks ( <i>P</i> <0.05) and the BDI from 8 weeks ( <i>P</i> =0.02) | 1 | Although all participants were depressed on the HDRS and BDI, not all had a pre-existing diagnosis of MDD<br>A comorbid personality disorder was present in 80% of individuals                                          | 6 | EPA: clinical     |
| 16. Jazayeri <i>et al</i> , 2008 <sup>13</sup>     | 48<br>– 16 <i>n</i> -3 HUFA & placebo<br>– 16 fluoxetine & placebo<br>– 16 <i>n</i> -3 HUFA & fluoxetine<br>( <i>n</i> =32 for meta-analysis)<br>Strata 1 | 8 weeks<br>Assessment: 2, 4, 6, 8 weeks                  | MDD (HDRS ≥15)<br>Adults                                                                                                                   | <b>EPA</b> 1g or fluoxetine 20mg or EPA 1g + fluoxetine 20mg    | HDRS<br>The combination of EPA and fluoxetine demonstrated greater benefit than either fluoxetine/EPA alone<br>EPA and fluoxetine showed similar efficacy       | 1 | 20% of individuals did not complete 4 weeks of the study and were not included in the analysis<br>The dose of fluoxetine was quite low and a higher dose may have had greater clinical efficacy<br>Short trial duration | 6 | EPA: clinical     |
| 17. Keck <i>et al</i> , 2006 <sup>55</sup>         | 116<br>–59 <i>n</i> -3 HUFA<br>–57 placebo                                                                                                                | 16 weeks<br>Assessment: baseline and 9 further occasions | BPAD (depressed)<br>Adults                                                                                                                 | <b>EPA</b> 6g                                                   | IDS–C, YMRS, CGI<br>No significant difference between the groups                                                                                                | – | Various psychotropic agents were used<br>High drop-out rate of 54%<br>Sufficient statistical data not presented                                                                                                         | – | –                 |
| 18. Kiecolt-Glaser <i>et al</i> 2012 <sup>14</sup> | 138<br>– 46 <i>n</i> -3 HUFA 2.5g<br>– 46 <i>n</i> -3 HUFA 1.25g<br>– 46 placebo<br>Strata 2                                                              | 16 weeks<br>Assessment: 0, 4, 8, 12, 16 weeks            | Older adults (mean age 51 years), sedentary lifestyle, not depressed (CES-D median 5)                                                      | <b>EPA</b> 2.085g+ DHA 0.348g or <b>EPA</b> 1.042g + DHA 0.124g | CES-D<br>No difference between groups                                                                                                                           | 4 | Individuals were not depressed at baseline                                                                                                                                                                              | 6 | EPA: non-clinical |

|                                                |                                                                                                                                      |                                           |                                     |                                 |                                                                                                                                                                                  |   |                                                                                                                                                                                                                                                                                                   |   |                   |
|------------------------------------------------|--------------------------------------------------------------------------------------------------------------------------------------|-------------------------------------------|-------------------------------------|---------------------------------|----------------------------------------------------------------------------------------------------------------------------------------------------------------------------------|---|---------------------------------------------------------------------------------------------------------------------------------------------------------------------------------------------------------------------------------------------------------------------------------------------------|---|-------------------|
| 19. Krauss-Etschmann et al, 2007 <sup>54</sup> | 311<br>77 <i>n</i> -3 HUFA<br>77 folate<br>77 <i>n</i> -3 HUFA + folate<br>80 placebo<br>Not in meta-analysis                        | 18 weeks<br>(22 weeks gestation delivery) | Healthy pregnant women              | <b>DHA 0.5g</b><br>+ 0.15g EPA  | EPDS                                                                                                                                                                             | – | Statistical data for EPDS not presented and only collected 2 months post-delivery                                                                                                                                                                                                                 | – | –                 |
| 20. Lesperance et al, 2011 <sup>15</sup>       | 432<br>– 218 <i>n</i> -3 HUFA (113 with comorbid anxiety disorder)<br>– 214 placebo (115 with comorbid anxiety disorder)<br>Strata 1 | 8 weeks<br>Assessment: 0, 8 weeks         | MDD (MINI 5.0.0 criteria)<br>Adults | <b>EPA 1.05g</b><br>+ DHA 0.15g | MADRS; IDS-SR (30)<br><i>n</i> -3 HUFA group had a trend towards reduced depressive symptoms that became significant when those without comorbid anxiety disorders were excluded | 1 | Short trial duration<br>Approximately 40% of individuals were on antidepressants and no separate data was presented for this group (thus only one strata possible), however, the authors describe no evidence for interaction with <i>n</i> -3 HUFA effect by participants taking antidepressants | 6 | EPA: clinical     |
| 21. Llorente et al 2003 <sup>16</sup>          | 89<br>– 44 DHA<br>– 45 placebo<br>Strata 1                                                                                           | 16 weeks<br>Assessment: 3, 8,16 weeks     | Postnatal depression (BDI >10)      | <b>DHA 0.2g</b>                 | BDI, EPDS<br>There was no difference in the emergence of depression between the two groups                                                                                       | 3 | Only 6.7% of subjects had a moderate depressive illness                                                                                                                                                                                                                                           | 6 | DHA: non-clinical |
| 22. Lucas et al 2009 <sup>17</sup>             | 120<br>– 59 <i>n</i> -3 HUFA (13 MDE)<br>– 61 placebo (16 MDE)<br>Strata 2                                                           | 8 weeks<br>Assessment: 0, 4, 8 weeks      | MDD (PGWBS ≤72)<br>Adults (women)   | <b>EPA 1.05g</b><br>+ DHA 0.15g | HDRS, HSCL-D-20, PGWBS<br>No differences between groups                                                                                                                          | 3 | Short trial duration<br>The study included non-depressed participants and pre- and post-menopausal women. A subgroup had MDD                                                                                                                                                                      | 6 | EPA: non-clinical |

|                                                  |                                                                            |                                                                                                             |                                                                                           |                                           |                                                                                                                                               |   |                                                                                                                                                                                   |   |                   |
|--------------------------------------------------|----------------------------------------------------------------------------|-------------------------------------------------------------------------------------------------------------|-------------------------------------------------------------------------------------------|-------------------------------------------|-----------------------------------------------------------------------------------------------------------------------------------------------|---|-----------------------------------------------------------------------------------------------------------------------------------------------------------------------------------|---|-------------------|
| 23. Makrides <i>et al</i> , 2010 <sup>18</sup>   | 2399<br>– 1197 <i>n</i> -3 HUFA<br>– 1202 placebo<br>Strata 1              | 19 weeks<br>(pregnant women <21 weeks gestation to birth of child)<br>Assessment: 6, 26 weeks post delivery | Healthy pregnant women<br>Depression diagnosed if EPDS >12<br>Adults                      | <b>DHA</b> 0.8g<br>+ EPA<br>0.1g          | EPDS<br>(children of mothers also examined for cognitive and language development)<br>No difference in rates of depression between the groups | 3 | No formal diagnosis of depression was made on any individual <i>n</i> -3 HUFAs and placebo were not administered for a period post-gestation, which may have altered the findings | 6 | DHA: non-clinical |
| 24. Marangell <i>et al</i> , 2003 <sup>19</sup>  | 35<br>– 18 <i>n</i> -3HUFA<br>– 17 placebo<br>Strata 1                     | 6 weeks<br>Assessment: 0, 2, 6 weeks                                                                        | MDD (MADRS ≥ 12) and HDRS ≥ 17)<br>Adults                                                 | <b>DHA</b> 2g                             | MADRS<br>No significant difference between groups                                                                                             | 1 | Short trial duration<br>Differences in baseline mood scores between groups                                                                                                        | 5 | DHA: clinical     |
| 25. Marangell <i>et al</i> , 2006 <sup>51</sup>  | 10<br>– 6 <i>n</i> -3 HUFA<br>– 4 placebo<br>Not included in meta-analysis | 52 weeks<br>Assessment: Several occasions (frequency not stated in paper)                                   | BPAD (euthymic)<br>Psychotropic agents tapered during study<br>Women planning to conceive | <b>DHA</b> 2g                             | BDI<br>No significant difference between the groups                                                                                           | – | Small sample size<br>Insufficient data for analysis or interpretation of trial result and thus not included in meta-analysis                                                      | – | –                 |
| 26. Mattes <i>et al</i> , 2009 <sup>20</sup>     | 75<br>– 37 <i>n</i> -3 HUFA<br>– 38 placebo<br>Strata 1                    | 20 weeks<br>(20 weeks gestation to birth of child)<br>Assessment: 0, 20 weeks                               | Healthy pregnant women<br>Only 16 individuals had BDI >10 (8 in each group)               | <b>DHA</b><br><b>2.24g</b> +<br>EPA 1.12g | BDI                                                                                                                                           | – | Most participants were not depressed, and a low BDI cut-off of 10 for depression may be associated with false positives for depression                                            | – | –                 |
| 27. Mischoulon <i>et al</i> , 2009 <sup>21</sup> | 35<br>– 16 <i>n</i> -3 HUFA<br>– 19 placebo<br>Strata 1                    | 8 weeks<br>Assessment: 0, 2, 4, 6, 8 weeks                                                                  | MDD (HDRS ≥ 18)<br>Adults                                                                 | <b>EPA</b> 1g                             | HDRS, CGI<br>No difference between groups                                                                                                     | 1 | Short trial duration<br>Small sample size                                                                                                                                         | 6 | EPA: clinical     |

|                                                          |                                                                                                                         |                                                                |                                  |                            |                                                                                                                                      |   |                                                                                                                                                                                                                                          |   |                              |
|----------------------------------------------------------|-------------------------------------------------------------------------------------------------------------------------|----------------------------------------------------------------|----------------------------------|----------------------------|--------------------------------------------------------------------------------------------------------------------------------------|---|------------------------------------------------------------------------------------------------------------------------------------------------------------------------------------------------------------------------------------------|---|------------------------------|
| 28. Mozaffari-Khosravi <i>et al</i> , 2013 <sup>22</sup> | 62<br>–21 EPA 1g<br>–20 DHA 1g<br>–21 placebo<br>Strata 2                                                               | 12 weeks<br>Assessment: 0, 6, 12 weeks                         | MDD, on antidepressants          | <b>EPA 1g or DHA 1g</b>    | HDRS, EPA demonstrated improved mood compared with placebo and DHA ( $P=0.001$ )                                                     | 2 | Modest sample size<br>Mean baseline mood scores in mild depression range. BDI scores not presented at follow-up                                                                                                                          | 5 | EPA clinical<br>DHA clinical |
| 29. Murphy <i>et al</i> , 2012 <sup>22</sup>             | 45<br>– 15 cytidine (2g) and <i>n</i> -3 HUFA<br>– 15 <i>n</i> -3 HUFA<br>– 15 placebo<br>Not included in meta-analysis | 16 weeks<br>Assessment: 0, 1, 2, 4, 6, 8, 10, 12, 14, 16 weeks | BPAD (clinically stable)         | <b>EPA 3g + DHA 2g</b>     | YMRS, MADRS, GAF<br>Study retention rates poorer for <i>n</i> -3 HUFA and <i>n</i> -3 HUFA and cytidine groups compared with placebo | – | Small sample size<br>Insufficient data presented at baseline or follow-up for analysis (data not separately presented for those who relapsed or those who did not attend a follow-up appointment) and thus not included in meta-analysis | – | –                            |
| 30. Nemets <i>et al</i> , 2002 <sup>23</sup>             | 20<br>– 10 <i>n</i> -3 HUFA<br>– 10 placebo<br>Strata 1                                                                 | 4 weeks<br>Assessment: 0, 1, 2, 3, 4 weeks                     | MDD (HDRS $\geq 18$ )<br>Adults  | <b>EPA 2g</b>              | HDRS<br>EPA was superior to placebo after 2 weeks ( $P<0.001$ )                                                                      | 1 | Small number of study participants.<br>Short trial duration                                                                                                                                                                              | 4 | EPA: clinical                |
| 31. Nemets <i>et al</i> , 2006 <sup>24</sup>             | 20<br>– 10 <i>n</i> -3 HUFA<br>– 10 placebo<br>Strata 1                                                                 | 16 weeks<br>Assessment: 0, 2, 4, 8, 12, 16 weeks               | MDD<br>Children                  | <b>EPA 0.4g + DHA 0.2g</b> | CDRS, CDI, CGI<br><i>n</i> -3 HUFAs were superior to placebo from 8 weeks ( $P<0.04$ ).                                              | 1 | Eight individuals who initially enrolled in trial, did not complete first month of study and were not included in analysis<br>Small sample size                                                                                          | 6 | EPA: clinical                |
| 32. Peet & Horrobin 2002 <sup>25</sup>                   | 70<br>– 17 EPA 1g<br>– 18 EPA 2g<br>– 17 EPA 4g<br>– 18 placebo<br>Strata 3                                             | 12 weeks<br>Assessment: 0, 4, 8, 12 weeks                      | MDD (HDRS $\geq 16$ ),<br>Adults | <b>EPA 1g, 2g or 4g</b>    | HDRS, BDI, MADRS<br>EPA was superior to placebo at a dose of 1g only for all measures                                                | 1 | Diagnosis was not attained using DSM-IV or ICD-10 criteria.                                                                                                                                                                              | 6 | EPA: clinical                |
| 33. Poppitt <i>et al</i> , 2009 <sup>26</sup>            | 102<br>– 51 DHA<br>– 51 placebo<br>Strata 1                                                                             | 12 weeks<br>Assessment: 0, 12                                  | Post stroke<br>Adults >45 years  | <b>DHA 0.7g EPA 0.3g</b>   | GHQ (Depression Index)<br>No difference between the groups                                                                           | 3 | Individuals were not depressed at baseline                                                                                                                                                                                               | 6 | DHA: Non-clinical            |



|                                                  |                                                                    |                                                                  |                                                                                               |                                                                                      |                                                                                                                             |   |                                                                                                                                                                           |   |                                                       |
|--------------------------------------------------|--------------------------------------------------------------------|------------------------------------------------------------------|-----------------------------------------------------------------------------------------------|--------------------------------------------------------------------------------------|-----------------------------------------------------------------------------------------------------------------------------|---|---------------------------------------------------------------------------------------------------------------------------------------------------------------------------|---|-------------------------------------------------------|
| 34. Rees <i>et al</i> , 2008 <sup>27</sup>       | 26<br>– 13 <i>n</i> -3 HUFA<br>– 13 placebo<br>Strata 1            | 6 weeks<br>Assessment:<br>Baseline and<br>at weekly<br>intervals | Perinatal MDD<br>(EPDS >13 +<br>HDRS >14 +<br>MDRS >25)<br>Adults                             | <b>DHA</b><br>1.64g +<br>EPA 0.41g                                                   | HDRS, EPDS,<br>MDRS<br>No significant<br>difference between<br>the groups                                                   | 1 | Short trial duration<br>Study included<br>pregnant and post-<br>partum individuals                                                                                        | 6 | DHA: clinical                                         |
| 35. Rogers <i>et al</i> , 2008 <sup>47</sup>     | 218<br>– 109 <i>n</i> -3 HUFA<br>– 109 placebo<br>Strata 1         | 12 weeks<br>Assessment: 0,<br>12 weeks                           | MDD (DASS ≥10-<br>28)<br>Adults                                                               | <b>DHA</b> 2.5g<br>+ EPA<br>1.9g                                                     | BDI, DASS, GHQ,<br>STAXI<br>No difference<br>between groups                                                                 | 2 | No DSM-IV or<br>ICD-10 criteria<br>were utilised                                                                                                                          | 6 | DHA: clinical                                         |
| 36. Rondanelli <i>et al</i> , 2010 <sup>28</sup> | 46<br>–22 <i>n</i> -3 HUFA<br>–24 placebo<br>Strata 1              | 8 weeks<br>Assessment:0,<br>8 weeks                              | MDD/dysthymia in<br>elderly nursing<br>home female<br>patients using<br>DSM-IV-TR<br>criteria | <b>EPA 1.67g</b><br>+ DHA<br>0.83g                                                   | GDS, SF-36<br><i>n</i> -3 HUFA group had<br>reduced depressive<br>symptoms and<br>improved quality of<br>life               | 1 | Short trial duration<br>Only females<br>included<br>Some individuals<br>had a diagnosis of<br>dysthymia                                                                   | 6 | EPA: clinical                                         |
| 37. Silvers <i>et al</i> , 2005 <sup>29</sup>    | 77<br>– 40 <i>n</i> -3 HUFA<br>– 37 placebo<br>Strata 1            | 12 weeks<br>Assessment: 0,<br>2, 4, 8, 12<br>weeks               | MDD<br>Adults                                                                                 | <b>DHA</b> 2.4g<br>+ EPA<br>0.6g                                                     | HDRS, BDI<br>No significant<br>difference between<br>the groups                                                             | 1 | Participants were<br>attending general<br>practitioners only<br>and perhaps did not<br>have a severe<br>depressive illness                                                | 6 | DHA : clinical                                        |
| 38. Sinn <i>et al</i> , 2012 <sup>30</sup>       | 50<br>– 17 EPA 1.67g<br>– 18 DHA 1.55g<br>– 15 placebo<br>Strata 2 | 26 weeks                                                         | Elderly individuals<br>with cognitive<br>impairment                                           | <b>EPA 1.67g</b><br>+<br>DHA0.16g<br>or<br><b>DHA</b><br><b>1.55g</b> +<br>EPA 0.40g | GDS<br>Both DHA ( <i>P</i> =0.01)<br>and EPA ( <i>P</i> =0.04)<br>demonstrated<br>improved mood<br>compared with<br>placebo | 3 | Only 36% of<br>individuals had a<br>GDS score >4<br>indicating possible<br>depression, and no<br>statistical data<br>available for meta-<br>analysis for this<br>subgroup | 5 | EPA: non-<br>clinical<br>and<br>DHA: non-<br>clinical |
| 39. Stoll <i>et al</i> , 1999 <sup>31</sup>      | 30<br>– 16 <i>n</i> -3 HUFA<br>– 14 placebo<br>Strata 1            | 16 weeks<br>Assessment: 0,<br>2, 4, 6, 8, 12,<br>16 weeks        | BPAD<br>(euthymic/deprese<br>d)<br>Adults                                                     | <b>EPA</b> 6.2g<br>+ DHA<br>3.4g                                                     | HDRS<br><i>n</i> -3 HUFA group had<br>a significantly longer<br>period of remission<br>( <i>P</i> = 0.002)                  | 1 | Modest numbers<br>Participants had to<br>remain in the study<br>for 30 days to be<br>included in the<br>analysis<br>Varying<br>concomitant<br>medications were<br>used    | 5 | EPA: clinical                                         |

|                                                       |                                                                                                                                                                 |                                               |                                                                                   |                                                                         |                                                                                                               |   |                                                                                                                                                                  |   |                   |
|-------------------------------------------------------|-----------------------------------------------------------------------------------------------------------------------------------------------------------------|-----------------------------------------------|-----------------------------------------------------------------------------------|-------------------------------------------------------------------------|---------------------------------------------------------------------------------------------------------------|---|------------------------------------------------------------------------------------------------------------------------------------------------------------------|---|-------------------|
| 40. Su <i>et al</i> , 2003 <sup>32</sup>              | 28<br>– 14 <i>n</i> -3 HUFA<br>– 14 placebo<br>Strata 1                                                                                                         | 8 weeks<br>Assessment: 0, 1, 2, 4, 6, 8 weeks | MDD (HDRS >18)<br>Adults                                                          | <b>EPA</b> 4.4g +<br>DHA 2.2g                                           | HDRS<br><i>n</i> -3 HUFA was superior to placebo from week 4 ( <i>P</i> =0.004)                               | 1 | Short duration of study<br>Only individuals completing study ( <i>n</i> =22) were included in analysis                                                           | 6 | EPA: clinical     |
| 41. Su <i>et al</i> , 2008 <sup>33</sup>              | 33<br>– 17 <i>n</i> -3 HUFA<br>– 16 placebo<br>Strata 1                                                                                                         | 8 weeks<br>Assessment: 0, 2, 4, 6, 8 weeks    | Perinatal MDD (16–32 weeks gestation) (DSM-IV criteria; HDRS ≥18)                 | <b>EPA</b> 2.2g +<br>DHA 1.2g                                           | HDRS, EPDS, BDI<br><i>n</i> -3 HUFA group had lower HDRS scores ( <i>P</i> =0.023)                            | 1 | Large drop-out rate<br>Small sample size<br>Short trial duration                                                                                                 | 6 | EPA: clinical     |
| 42. Tajalizadekhoob <i>et al</i> , 2011 <sup>34</sup> | 66<br>– 33 <i>n</i> -3 HUFA (4 on antidepressants)<br>– 33 placebo (7 on antidepressants)<br>Strata 2                                                           | 26 weeks<br>Assessment: 0, 13, 26 weeks       | GDS (5–11) to satisfy criteria for mild-moderate depression<br>Elderly (MMSE ≥22) | <b>EPA 0.18g</b> +<br>DHA 0.12g                                         | GDS<br><i>n</i> -3 HUFA group had a reduction in depressive symptoms compared with controls ( <i>P</i> =0.02) | 3 | Patients were selected with mild to moderate depression for treatment<br>Although severe dementia was out-ruled, some cognitive impairment may have been present | 6 | EPA: non-clinical |
| 43. Van de Rest <i>et al</i> , 2008 <sup>35</sup>     | 302<br>– 96 EPA 1.09g ( <i>n</i> =27 with CES-D ≥8)<br>– 100 EPA 0.23g ( <i>n</i> =33 with CES-D ≥8)<br>– 106 placebo ( <i>n</i> =44 with CES-D ≥8)<br>Strata 4 | 26 weeks<br>Assessment: 0, 13, 26 weeks       | Mental well-being (CES-D mean 5.9–6.8)<br>Adults (≥65)                            | <b>EPA</b> 1.09g +<br>DHA 0.85<br>or<br><b>EPA</b> 0.23g +<br>DHA 0.18g | MADRS; CES-D, GDS, HADS-A<br>No differences between groups                                                    | 3 | Included individuals who were predominantly free of depression                                                                                                   | 6 | EPA: non-clinical |

ALA,  $\alpha$ -linolenic acid; BDI Beck Depression Inventory; BPAD, bipolar affective disorder; CDI, Childhood Depression Inventory; CDRS, Childhood Depression Rating Scale; CES-D, Center for Epidemiologic Studies Depression Scale; CGI, Clinical Global Impression; CGI-BP, Clinical Global Impression – Bipolar Version; CIDI, Composite International Diagnostic Interview; DASS, Depression and Anxiety Stress Scale; DHA, docosahexaenoic acid; DHUS, Daily Hassles and Uplifts Scale; EPA, eicosapentaenoic acid; EPDS, Edinburgh Post-Natal Depression Scale; GAF, Global Assessment of Functioning; GDS, Geriatric Depression Scale; GHQ, General Health Questionnaire; HADS-A, Hospital Anxiety and Depression Scale; HDRS, Hamilton Depression Rating Scale; HSCL-D-20, Hopkins Symptom Checklist Depression Scale; IDS-C, Inventory of Depressive Symptomatology; MADRS, Montgomery–Åsberg Depression Rating Scale; MDD, major depressive disorder; MDE, major depressive episode; MMSE, Mini-Mental State Examination; MINI, Mini-International Neuropsychiatric Interview; OAS-M, Overt Aggression Scale – Modified; PANSS, Positive and Negative Syndrome Scale; PGWBS, Psychological General Well-Being Schedule; PHQ, Public Health

Questionnaire; PSS, Perceived Stress Scale; SF-36, Short Form 36-Item Health Survey; STAXI, State Trait Anger Expression Inventory; YMRS, Young Mania Rating Scale.

## Data Sources

We carried out a systematic bibliographic search using several databases and yielded 1,255 separate studies, 107 of which were reviewed in detail. We describe below the MEDLINE search strategy (Table DS2).

**Table DS2 MEDLINE Search**

| <b>Diagnosis</b>    | <b>HUFA</b>                                    | <b>Studies</b> | <b>Studies examined</b> | <b>Included studies</b> |
|---------------------|------------------------------------------------|----------------|-------------------------|-------------------------|
| Depression          | Omega-3 fatty acids                            | 614            | 68                      | 36                      |
| Depressive Disorder | Omega-3 fatty acids                            | 254            | 2                       | 36                      |
| Depression          | Omega-3 PUFA(s) or Polyunsaturated fatty acids | 551            | 4                       | 38                      |
| Depressive Disorder | Omega-3 PUFA(s)                                | 237            | 2                       | 38                      |
| Depression          | n-3 PUFA(s)                                    | 214            | 0                       | 39                      |
| Depressive Disorder | n-3 PUFA(s)                                    | 59             | 1                       | 39                      |
| Depression          | Omega-3 HUFA(s)                                | 15             | 0                       | 39                      |
| Depressive Disorder | Omega-3 HUFA(s)                                | 8              | 0                       | 39                      |
| Depression          | Omega-3 EFA(s) or Essential Fatty Acids        | 131            | 1                       | 39                      |
| Depressive Disorder | Omega-3 EFA(s)                                 | 34             | 0                       | 39                      |
| Depression          | n-3 EFA(s)                                     | 56             | 0                       | 40                      |
| Depressive Disorder | n-3 EFA(s)                                     | 15             | 0                       | 40                      |
| Depression          | HUFA(s) or Highly unsaturated fatty acids      | 62             | 1                       | 40                      |
| Depressive Disorder | HUFA(s)                                        | 10             | 0                       | 40                      |
| Depression          | EPA or Eicosapentaenoic Acid                   | 232            | 3                       | 40                      |
| Depressive Disorder | EPA                                            | 70             | 0                       | 40                      |
| Depression          | DHA or Docosahexaenoic Acid                    | 206            | 4                       | 41                      |
| Depressive Disorder | DHA                                            | 73             | 0                       | 41                      |
| Bipolar Disorder    | Omega-3 fatty acids                            | 127            | 1                       | 41                      |
| Bipolar Disorder    | Omega-3 PUFA(s)                                | 117            | 0                       | 41                      |
| Bipolar Disorder    | n-3 PUFA                                       | 24             | 0                       | 41                      |
| Bipolar Disorder    | Omega-3 HUFA                                   | 117            | 0                       | 41                      |
| Bipolar Disorder    | Omega-3 EFA                                    | 4              | 0                       | 41                      |
| Bipolar Disorder    | n-3 EFA                                        | 0              | 0                       | 41                      |
| Bipolar Disorder    | HUFA                                           | 5              | 0                       | 41                      |

|                          |                     |       |     |    |
|--------------------------|---------------------|-------|-----|----|
| Bipolar Disorder         | EPA                 | 38    | 1   | 41 |
| Bipolar Disorder         | DHA                 | 46    | 0   | 41 |
| Bipolar Depression       | Omega-3 fatty acids | 131   | 1   | 41 |
| Bipolar Depression       | Omega-3 PUFA(s)     | 131   | 0   | 41 |
| Bipolar Depression       | n-3 PUFA            | 25    | 1   | 41 |
| Bipolar Depression       | Omega-3 HUFA        | 4     | 0   | 41 |
| Bipolar Depression       | Omega-3 EFA         | 30    | 0   | 41 |
| Bipolar Depression       | HUFA                | 5     | 0   | 41 |
| Bipolar Depression       | EPA                 | 50    | 0   | 41 |
| Bipolar Depression       | DHA                 | 2     | 0   | 41 |
| Mood Disorder            | Omega-3 fatty acids | 359   | 1   | 41 |
| Mood Disorder            | Omega-3 PUFA(s)     | 461   | 3   | 41 |
| Mood Disorder            | n-3 PUFA            | 84    | 1   | 41 |
| Mood Disorder            | Omega-3 HUFA        | 12    | 0   | 41 |
| Mood Disorder            | Omega-3 EFA         | 57    | 0   | 41 |
| Mood Disorder            | n-3 EFA             | 23    | 0   | 41 |
| Mood Disorder            | HUFA                | 15    | 0   | 41 |
| Mood Disorder            | EPA                 | 116   | 0   | 41 |
| Mood Disorder            | DHA                 | 89    | 0   | 41 |
|                          | -                   | -     | 95  | 41 |
| Searching other articles |                     |       | 1*  | 42 |
| Searching author names   | -                   | -     | 1** | 43 |
| Total                    |                     | 1,255 |     | 43 |

\*Poppitt S et al., (2009) paper ascertained by searching references of other articles (Giltay et al., 2012).

\*\*Appleton et al., (2011) paper ascertained by searching specific authors working in this field. Multiple meta-analysis, systematic review and other review articles also accessed (n = 20).

No additional articles were attained from the other search strategies as outlined in the paper.

## Excluded Studies

We excluded a number of double-blind, randomised placebo-controlled trials from the meta-analysis, largely due to the limited statistical data available. These studies are outlined here (Table DS3, see also Table DS1).

**Table DS3**

| <b>Study Group</b>                | <b>N (Total: n-3 HUFA/Placebo)</b>                                     | <b>Study Duration</b>                     | <b>Illness type of patient group</b>                       | <b>HUFA formulation (daily dose)</b> | <b>Reason(s) for exclusion from meta-analysis</b>                                                                                                                                     |
|-----------------------------------|------------------------------------------------------------------------|-------------------------------------------|------------------------------------------------------------|--------------------------------------|---------------------------------------------------------------------------------------------------------------------------------------------------------------------------------------|
| Chiu et al., 2005                 | 15 (unsure how many in each group)                                     | 4 weeks                                   | BPAD - mania (YMRS >20)                                    | EPA 2.2g + DHA 1.6g                  | We did not examine bipolar mania in meta-analysis. Statistical data not presented.                                                                                                    |
| Marangell et al., 2006            | 6 = n-3 HUFA<br>4 = Placebo                                            | 52 weeks                                  | BPAD - euthymic                                            | 2g DHA                               | Statistical data not presented                                                                                                                                                        |
| Keck et al., 2006                 | 59 = n-3 HUFA<br>57 = Placebo                                          | 16 weeks                                  | BPAD - depressed                                           | 6g EPA                               | Statistical data not presented.                                                                                                                                                       |
| Krauss-Etschmann et al., 2007     | 77 = n-3 HUFA<br>77 = Folate<br>77 = N-3 HUFA + Folate<br>80 = Placebo | 18 weeks (22 weeks gestation to delivery) | Healthy Pregnant women                                     | 0.5g DHA + 0.15g EPA                 | Statistical data for EPDS (collected only 2 months after delivery) was not presented                                                                                                  |
| Mattes et al., 2009               | 37 = n-3 HUFA<br>38 = Placebo                                          | 20 weeks (20 weeks gestation to delivery) | Healthy Pregnant Women =65, 16 = BDI>10 (8 in both groups) | 2.24g DHA + 1.12g EPA                | Statistical data not presented.                                                                                                                                                       |
| Gracious et al.,                  | 25 = n-3 HUFA<br>26 = Placebo                                          | 16 weeks                                  | BPAD Children                                              | ALA 0.55-5.5g                        | n-3 HUFA in study formulation was not EPA or DHA and thus dose of either was not possible to elucidate                                                                                |
| Appleton et al., 2011             | 53 = n-3 HUFA<br>60 = Placebo                                          | 16 weeks                                  | Mild-Moderate Depression DASS 10-24                        | EPA 0.64g + 0.44g DHA                | Statistical analysis for effect on mood not presented                                                                                                                                 |
| Murphy et al., 2012 <sup>57</sup> | 15 = n-3 HUFA<br>15 = n-3 HUFA + 2g Cytidine<br>15 = Placebo           | 16 weeks                                  | BPAD - euthymic                                            | EPA 3g + DHA 2g                      | Statistical data not presented (data not separately presented for those who relapsed and those who failed to attend an appointment). Initial baseline data for 3 groups not presented |

BDI = Beck Depression Inventory; BPAD = Bipolar Affective Disorder; DASS = Depression and Anxiety Symptom Scale; EPDS = Edinburgh Post-natal Depression Scale; YMRS = Young Mania Rating Scale

### **Publication Bias: Further Details**

We ran Duval and Tweedie's trim and fill model initially using the random effects version as there was a great deal of variation between studies. The only mathematical difference between random and fixed models is that the random effects model adds a term " $\gamma$ " to account for the between-study variance (Riebler, 2008) which the fixed effect model sets to 0. As it is very unlikely that between study variance is negligible in the group of studies presented, we feel that the random effects model is the more accurate model to assess publication bias in this study. The Cochrane Handbook for Systematic Reviews of Interventions specifically mentions the trim and fill model and states that it "is known to perform poorly in the presence of between-study heterogeneity" and suggests that the funnel plot might be, "inappropriate for heterogeneous meta-analyses, drawing attention to the premise that the studies come from a single underlying population given by the originators of the funnel plot" (Terrin et al., 2005). We noted that (without the imputed studies) all but one study made what seems a close approximation of a normal distribution:

### **Meta-Regression**

We evaluated the association between omega-3 HUFAs and depression severity utilising a 4 point scale.

- "1" denoted studies of individuals as being moderately or severely clinically depressed if they were being treated for an episode of diagnosed (DSM/ICD) major

depressive episode, the depressed pole of a bipolar disorder, or multiple episodes of deliberate self-harm.

- "2" denoted studies of individuals with a depressive episode co-morbid with a medical disease such as Parkinson disease or diabetes mellitus.
- "3" denoted studies of individuals in healthy populations at risk for depression that included a sub-group of individuals with depression as determined by screening instruments, rating scales or clinical diagnosis.
- "4" denoted by presence of depressive symptoms in healthy populations at risk for depression such as elderly individuals, those in ante-natal or post-natal periods, and individuals with serious medical illnesses.

Ratings were undertaken blindly by BH and JD with a rank correlation of 0.9 attained between the raters. Sensitivity analyses carried out on using this alternative conceptualization of severity.

## **Data and Results**

### **Statistical Indices:**

The Q statistic of heterogeneity describes the proportion of total variation in study estimates due to heterogeneity, where  $p < 0.05$  indicates that statistically significant heterogeneity is present.  $I^2$  is an estimation of the proportion of overall variation attributable to between-study heterogeneity, and Tau square is an estimation of standard deviation of variance across studies, (complete data tables are available in the web supplement). Q,  $I^2$ , and Tau square reflect a particular branch of the hypothesis testing meta-analysis and cannot be used to compare different branches (see Fig. 2).



## **Implications for further research**

Diagnosed Depression in Clinical Population versus Depressive symptoms non-clinical population:

Our primary distinction to separate episodes of diagnosed depressive illness from milder depressed symptoms among non-clinical populations at risk for depression was a dichotomous classification and is supported by this meta-regression.

The meta-regression may more fully capture the complex distinction, in explaining the contradictory findings. We found the EPA versus placebo difference to be considerably smaller in monotherapy. These require a long duration of treatment (1-2 years), to have a reasonable likelihood of detecting a difference in time to relapse (using survival statistics) or number of relapses. Our meta-analysis is exploratory and results should be interpreted with cautions. Augmentation studies must be done on participants sufficiently depressed to need antidepressant treatment, and with the standard methodology of clinical trials of treatments of depression. Maintenance studies need a criterion of number of past episodes per unit time, as this is an important aspect of severity in secondary preventive studies to prevent relapse. These studies require a long duration of treatment (1-2 years), to have a reasonable likelihood of detecting a difference in time to relapse (using survival statistics) or number of relapses. There has been only one prophylactic study of recurrent depression, of one month duration. It is too short a time to expect that many will relapse, and so is vastly underpowered. These patients had a severity rating in the middle of the normal range, so there was little likelihood that omega-3 HUFAs would have much of an effect to the floor effects.

This is a much more difficult problem in studies of primary prevention studies or mixed primary secondary prevention studies. In studies of primary prevention, such as administration during pregnancy to prevent antenatal and or post-natal depression, depending on the criteria, most patients will not have had a prior depression. Even for severe depression, most patients are not depressed most of their lives, even before treatment were available. Severe depression is a recurrent disease with often long periods of normal function between episodes of depression. It is much harder to detect that they will be depressed on a given day, and might be easier to detect that participants had an episode of depression sometime during the time on omega-3 HUFA administration. Weekly diaries might be better than a one-time

intensive questionnaire. Studies of primary prevention often require very large sample to detect a preventive effects of a treatment proven to be efficacious in secondary prevention. It is possible that there would be enough studies of EPA to efficacy to warrant larger studies, but by that time much more might be known how to design such studies.

There are all also studies to determine the health benefits of omega-3 HUFAs. Sometimes a measure of mood is included as a secondary measure in studies of other health benefits. There are considerable day to day, week to week fluctuation in mood. It is not at all clear that normal mood variation from happy to sad, is the same phenomena as manic or depression. Mood is a normal affect. We think studies of mood is a conceptually different study outcome from clinical depression. More studies are needed of this as well, but positive or negative results of mood may not necessarily translate into positive or negative outcome of clinical depression.

#### **Additional references**

Riebler A. *Publication Bias in Meta-analysis. The Trim and Fill Method*. Biostatistics Unit, Institute of Social and Preventative Medicine, University of Zurich, Switzerland, PhD Seminar, 25 May, 2008.

Terrin N, Schmid CH, Lau J. IN a empirical evaluation of the funnel plot, researchers could not visually identify publication bias. *J Clin Epidemiol* 2005; **58**; 894-90.



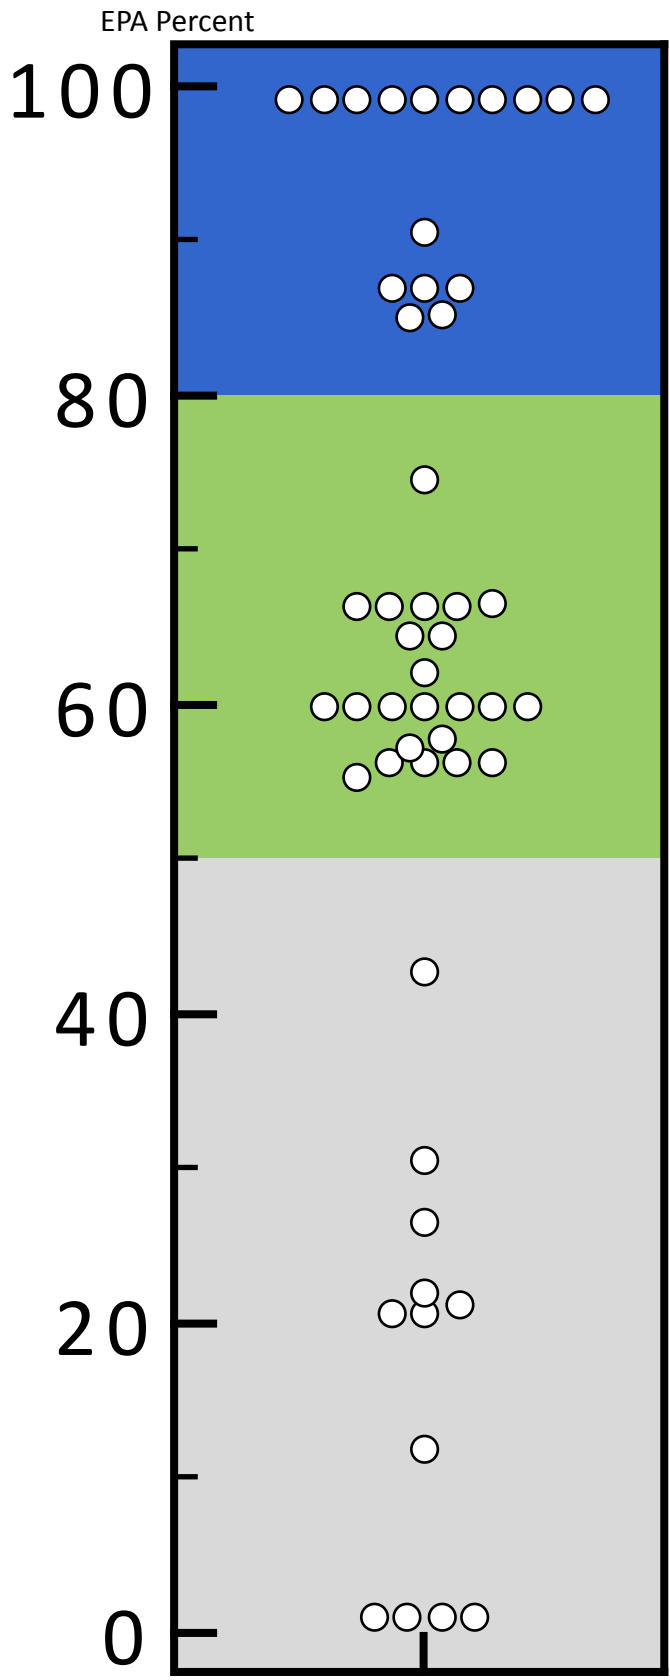

Figure DS1:  
Percentage of EPA in Omega-3  
HUFA Strata

Selectively Enriched EPA Strata

Mixed EPA Strata

95% of strata fell within these bounds.

DHA Predominant Strata

- Key
- Each dot represents an individual stratum.
  - Colors demarcate what group the strata belong to.
